# Supplementary material
Source: PubMed Central journal article supplement (PMC3311362)
Supplement: 1113113109_pnas.201113113SI.pdf [file 1113113109_pnas.201113113SI.pdf]

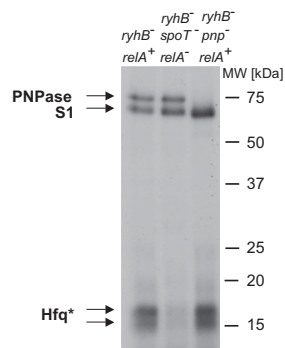

**Fig. S2.** RelA affects Hfq binding to RyhB in polysomal fractions extracted from cultures grown under conditions of limiting iron. UV cross-linking of labeled RyhB incubated with ribosomes extracted from the strains *relA*<sup>+</sup>, *relA*<sup>-</sup>, and *relA*<sup>+</sup>*pnp*<sup>-</sup> as indicated. The proteins were analyzed by SDS/PAGE as in Fig. 3A. Arrows indicate Hfq, S1, and PNPase proteins. Hfq protein bound to residues of labeled RyhB (Hfq\*).

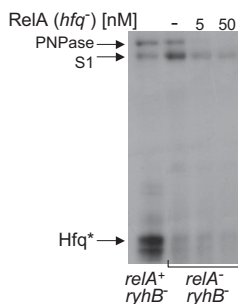

**Fig. S3.** The addition of purified RelA failed to complement *relA*<sup>-</sup> polysomal fractions. UV cross-linking of labeled RyhB incubated with ribosomes (22 °C for 15 min.) extracted from *relA*<sup>+</sup>*ryhB*<sup>-</sup> or *relA*<sup>-</sup>*spoT*<sup>-</sup>*ryhB*<sup>-</sup>. Samples of *relA*<sup>-</sup>*spoT*<sup>-</sup>*ryhB*<sup>-</sup> were supplemented with 5 nM or 50 nM of RelA purified from *hfg*<sup>-</sup>. Proteins covalently bound to residues of labeled RNA were detected in 15% SDS/PAGE. Arrows indicate Hfq, S1, and PNPase proteins. Hfq protein bound to residues of labeled RyhB (Hfq\*). The strain *relA*<sup>-</sup> is also *spoT*<sup>-</sup>.

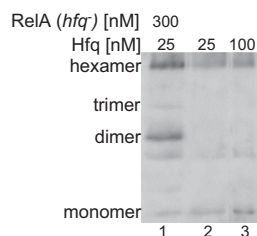

**Fig. S4.** In vitro oligomerization of Hfq as a function of its concentration. Low and high concentration of Hfq were incubated without or with RelA (where indicated) for 15 min at 22 °C. Thereafter, the proteins were cross-linked using 0.4% freshly diluted glutaraldehyde for 1.5 min. Cross-linking was stopped with freshly made glycine (200 nM). The proteins were boiled in loading buffer, and equal amounts were loaded in 15% SDS/PAGE. Hfq was detected by Western blotting using  $\alpha$ -Hfq. Measurement of the ratio of hexamer to dimer (when present) to monomer shows a proportion of 0.5, 0.33, and 0.04, respectively (lane 1); 0.62 and 0.25 (lane 2); and 0.66 and 0.25 (lane 3).
